# Supplementary material for: Highly effective nanoparticle removal in plant-based water filters
Source: Royal Society of Chemistry journal article supplement (doi:10.1039/d3va00035d), 2023-01-01
Supplement: d3va00035d1.xlsx [file d3va00035d1.xlsx]

## Sheet: Samples Report for 8767_SR_mori
8767_SR_moringaoleifera, Samples report created on 08/09/2022
Experiment: 8767_SR_moringaoleifera
	Peak List Generator: unknown
		Version: unknown
		Charge States Calculated: unknown
		Deisotoped: unknown
		Textual Annotation: unknown
	Database Set: 1 Database
		Database Name: 8767.fasta; Contaminants_Hao_2022.fasta; M_oleifera_UniProt_072522.fasta
			Version: unknown
			Taxonomy: All Entries
			Number of Proteins: 576
		Explain Database w/ < 1000 entries:
		Does database contain common contaminants?: unknown
	Search Engine Set: 1 Search Engine
		Search Engine: Sequest
			Version: IseNode in Proteome Discoverer 2.5.0.400
			Samples: All Samples
			Fragment Tolerance: 0.60 Da (Monoisotopic)
			Parent Tolerance: 10.0 PPM (Monoisotopic)
			Fixed Modifications: +57 on C (Carbamidomethyl)
			Variable Modifications: +16 on M (Oxidation), +42 on Peptide N-Terminal (Acetyl)
			Database: 8767.fasta; Contaminants_Hao_2022.fasta; M_oleifera_UniProt_072522.fasta (unknown version, 576 entries)
			Digestion Enzyme: Trypsin
			Max Missed Cleavages: 2
			Probability Model:
				8767_LS_01: Peptide Prophet with Delta Mass Correction [+2 and below,+3,+4,+5,+6 and above]
				8767_LS_02: Peptide Prophet with Delta Mass Correction [+2 and below,+3,+4,+5,+6 and above]
				8767_LS_03: Peptide Prophet with Delta Mass Correction [+2 and below,+3,+4,+5,+6 and above]
	Scaffold: Version: Scaffold_5.1.2
		Modification Metadata Set: 2334 modifications
			Source: C:\Program Files\Scaffold\parameters\unimod.xml
			Comment:
		Protein Grouping Strategy: Experiment-wide grouping with binary peptide-protein weights
		Peptide Thresholds: 95.0% minimum
		Protein Thresholds: 99.0% minimum and 2 peptides minimum
		Peptide FDR: 56.3% (Decoy)
		Protein FDR: 88.3% (Decoy)
		GO Annotation Source(s):
		Pathway Annotation Source(s):
		Alternate ID Source(s): FASTA:UniProt/Swiss-Prot Alt. Accession (UniProtKB) and FASTA:UniProt/Swiss-Prot Alt. Accession (UniProtKB)
									Quantitative Value (Normalized Total Spectra)	Quantitative Value (Normalized Total Spectra)	Quantitative Value (Normalized Total Spectra)
8767_SR_moringaoleifera									Uncategorized Sample	Uncategorized Sample	Uncategorized Sample
#	Visible?	Starred?	Identified Proteins (369)	Accession Number	Alternate ID	Molecular Weight	Protein Grouping Ambiguity	Taxonomy	8767_01	8767_02	8767_03
1	TRUE	Empty	Filaggrin OS=Homo sapiens OX=9606 GN=FLG PE=1 SV=3	Cont_P20930	FLG	435 kDa		unknown	19.801	22.22	25.01
2	TRUE	Empty	Keratin, type II cytoskeletal 1 OS=Homo sapiens OX=9606 GN=KRT1 PE=1 SV=6	Cont_P04264	KRT1	66 kDa	TRUE	unknown	9.4293	92.585	43.589
3	TRUE	Empty	Filaggrin OS=Homo sapiens OX=9606 GN=FLG PE=1 SV=3	Cont_P20930-DECOY		?		unknown	19.801	12.962	20.723
4	TRUE	Empty	Keratin, type II cytoskeletal 2 epidermal OS=Homo sapiens OX=9606 GN=KRT2 PE=1 SV=2	Cont_P35908	KRT2	65 kDa	TRUE	unknown	12.258	83.326	28.583
5	TRUE	Empty	2S albumin precursor [Moringa oleifera]	AHG99682.1		19 kDa	TRUE	unknown	79.206	0	2.8583
6	TRUE	Empty	Keratin, type I cytoskeletal 9 OS=Homo sapiens OX=9606 GN=KRT9 PE=1 SV=3	Cont_P35527	KRT9	62 kDa	TRUE	unknown	7.5434	61.106	32.871
7	TRUE	Empty	CBP3 OS=Moringa oleifera OX=3735 PE=3 SV=1	A0A3G6IGT2		19 kDa	TRUE	unknown	59.404	0	0
8	TRUE	Empty	Keratin, type I cytoskeletal 10 OS=Homo sapiens OX=9606 GN=KRT10 PE=1 SV=6	Cont_P13645	KRT10	59 kDa	TRUE	unknown	4.7146	42.589	22.867
9	TRUE	Empty	Keratin, type II cytoskeletal 5 OS=Homo sapiens OX=9606 GN=KRT5 PE=1 SV=3	Cont_P13647	KRT5	62 kDa	TRUE	unknown	13.201	59.254	25.725
10	TRUE	Empty	2S albumin precursor [Moringa oleifera]	AHG99681.1		19 kDa	TRUE	unknown	0	0	2.8583
11	TRUE	Empty	CBP3 OS=Moringa oleifera OX=3735 PE=3 SV=1	A0A3G6IGI3 (+1)		18 kDa	TRUE	unknown	68.834	0	0
12	TRUE	Empty	CBP3 OS=Moringa oleifera OX=3735 PE=3 SV=1	A0A3G6IME9		19 kDa	TRUE	unknown	44.318	0	2.1437
13	TRUE	Empty	Keratin, type I cytoskeletal 16 OS=Homo sapiens OX=9606 GN=KRT16 PE=1 SV=4	Cont_P08779	KRT16	51 kDa	TRUE	unknown	0	37.034	16.435
14	TRUE	Empty	Keratin, type I cytoskeletal 14 OS=Homo sapiens OX=9606 GN=KRT14 PE=1 SV=4	Cont_P02533	KRT14	52 kDa	TRUE	unknown	0	33.33	15.006
15	TRUE	Empty	Keratin, type II cytoskeletal 6B OS=Homo sapiens OX=9606 GN=KRT6B PE=1 SV=5	Cont_P04259	KRT6B	60 kDa	TRUE	unknown	0	42.589	17.864
16	TRUE	Empty	Filaggrin-2 OS=Homo sapiens OX=9606 GN=FLG2 PE=1 SV=1	Cont_Q5D862	FLG2	248 kDa		unknown	6.6005	9.2585	7.8604
17	TRUE	Empty	Keratin, type II cytoskeletal 6C OS=Homo sapiens OX=9606 GN=KRT6C PE=1 SV=3	Cont_P48668	KRT6C	60 kDa	TRUE	unknown	4.7146	42.589	16.435
18	TRUE	Empty	Keratin, type II cytoskeletal 73 OS=Mus musculus OX=10090 GN=Krt73 PE=1 SV=1	Cont_Q6NXH9	Krt73	59 kDa	TRUE	unknown	0	35.182	20.008
19	TRUE	Empty	Coagulation factor V OS=Bos taurus OX=9913 GN=F5 PE=1 SV=1	Cont_Q28107	F5	249 kDa		unknown	10.372	7.4068	7.1458
20	TRUE	Empty	Trypsin OS=Sus scrofa OX=9823 PE=1 SV=1	Cont_P00761		24 kDa		unknown	0	53.699	17.15
21	TRUE	Empty	Keratin, type I cytoskeletal 10 OS=Mus musculus OX=10090 GN=Krt10 PE=1 SV=3	Cont_P02535 (+1)	Krt10	58 kDa	TRUE	unknown	1.8859	0	10.719
22	TRUE	Empty	Protein Ycf2 OS=Moringa oleifera OX=3735 GN=ycf2 PE=3 SV=1	A0A482EBE0	ycf2	269 kDa		unknown	15.087	7.4068	5.7166
23	TRUE	Empty	Protein TIC 214 OS=Moringa oleifera OX=3735 GN=ycf1 PE=3 SV=1	A0A4Y5PS30	ycf1	222 kDa		unknown	8.4863	12.962	13.577
24	TRUE	Empty	Coagulation factor V OS=Bos taurus OX=9913 GN=F5 PE=1 SV=1	Cont_Q28107-DECOY		?		unknown	4.7146	7.4068	7.8604
25	TRUE	Empty	Protein TIC 214 OS=Moringa oleifera OX=3735 GN=ycf1 PE=3 SV=1	A0A4Y5PS30-DECOY		?		unknown	12.258	7.4068	11.433
26	TRUE	Empty	Keratin, type II cytoskeletal 2 epidermal OS=Mus musculus OX=10090 GN=Krt2 PE=1 SV=1	Cont_Q3TTY5	Krt2	71 kDa	TRUE	unknown	2.8288	33.33	14.292
27	TRUE	Empty	Intersectin 1 OS=Bos taurus OX=9913 GN=ITSN1 PE=4 SV=3	Cont_E1BKY4-DECOY		?		unknown	7.5434	0	8.5749
28	TRUE	Empty	Trehalose-6-phosphate synthase OS=Moringa oleifera OX=3735 PE=2 SV=1	A0A345K452		97 kDa	TRUE	unknown	21.687	5.5551	2.8583
29	TRUE	Empty	Keratin, type II cytoskeletal 71 OS=Mus musculus OX=10090 GN=Krt71 PE=1 SV=1	Cont_Q9R0H5	Krt71	57 kDa	TRUE	unknown	3.7717	7.4068	10.719
30	TRUE	Empty	Protein Ycf2 OS=Moringa oleifera OX=3735 GN=ycf2 PE=3 SV=1	A0A482EBE0-DECOY		?		unknown	4.7146	18.517	7.1458
31	TRUE	Empty	Hornerin OS=Homo sapiens OX=9606 GN=HRNR PE=1 SV=2	Cont_Q86YZ3	HRNR	282 kDa		unknown	12.258	9.2585	6.4312
32	TRUE	Empty	Collagen alpha-1(III) chain OS=Bos taurus OX=9913 GN=COL3A1 PE=1 SV=1	Cont_P04258	COL3A1	94 kDa		unknown	8.4863	9.2585	6.4312
33	TRUE	Empty	Filaggrin-2 OS=Homo sapiens OX=9606 GN=FLG2 PE=1 SV=1	Cont_Q5D862-DECOY		?		unknown	9.4293	5.5551	9.2895
34	TRUE	Empty	Intersectin 1 OS=Bos taurus OX=9913 GN=ITSN1 PE=4 SV=3	Cont_E1BKY4	ITSN1	195 kDa		unknown	14.144	0	5.7166
35	TRUE	Empty	Keratin, type I cytoskeletal 17 OS=Homo sapiens OX=9606 GN=KRT17 PE=1 SV=2	Cont_Q04695	KRT17	48 kDa	TRUE	unknown	1.8859	11.11	4.2875
36	TRUE	Empty	Alpha-2-macroglobulin OS=Bos taurus OX=9913 GN=A2M PE=1 SV=2	Cont_Q7SIH1	A2M	168 kDa		unknown	12.258	0	2.1437
37	TRUE	Empty	Keratin, type II cytoskeletal 6A OS=Mus musculus OX=10090 GN=Krt6a PE=1 SV=3	Cont_P50446	Krt6a	59 kDa	TRUE	unknown	4.7146	0	10.719
38	TRUE	Empty	Putative LOV domain-containing protein OS=Moringa oleifera OX=3735 PE=2 SV=1	A0A126WVT1		113 kDa		unknown	3.7717	5.5551	7.1458
39	TRUE	Empty	Keratin, type II cuticular Hb5 OS=Homo sapiens OX=9606 GN=KRT85 PE=1 SV=1	Cont_P78386	KRT85	56 kDa	TRUE	unknown	1.8859	9.2585	2.8583
40	TRUE	Empty	Keratin, type I cytoskeletal 15 OS=Homo sapiens OX=9606 GN=KRT15 PE=1 SV=3	Cont_P19012	KRT15	49 kDa	TRUE	unknown	2.8288	0	4.2875
41	TRUE	Empty	Complement factor H OS=Bos taurus OX=9913 GN=CFH PE=1 SV=3	Cont_Q28085	CFH	140 kDa		unknown	9.4293	0	7.1458
42	TRUE	Empty	Keratin, type I cytoskeletal 15 OS=Ovis aries OX=9940 GN=KRT15 PE=2 SV=1	Cont_O77727	KRT15	49 kDa	TRUE	unknown	0	0	7.8604
43	TRUE	Empty	Keratin, type I cytoskeletal 28 OS=Bos taurus OX=9913 GN=KRT28 PE=2 SV=1	Cont_Q148H6	KRT28	51 kDa	TRUE	unknown	4.7146	0	7.8604
44	TRUE	Empty	Keratin type II (Fragment) OS=Mus musculus OX=10090 GN=Krt83 PE=2 SV=1	Cont_Q61726	Krt83	55 kDa	TRUE	unknown	1.8859	0	5.0021
45	TRUE	Empty	Serotransferrin OS=Bos taurus OX=9913 GN=TF PE=2 SV=1	Cont_Q29443-DECOY		?	TRUE	unknown	6.6005	7.4068	6.4312
46	TRUE	Empty	Inter-alpha-trypsin inhibitor heavy chain H4 OS=Bos taurus OX=9913 GN=ITIH4 PE=1 SV=1	Cont_Q3T052	ITIH4	102 kDa		unknown	11.315	5.5551	6.4312
47	TRUE	Empty	Keratin, type II cytoskeletal 7 OS=Homo sapiens OX=9606 GN=KRT7 PE=1 SV=5	Cont_P08729	KRT7	51 kDa	TRUE	unknown	0	0	9.2895
48	TRUE	Empty	Keratin, type I cytoskeletal 25 OS=Homo sapiens OX=9606 GN=KRT25 PE=1 SV=1	Cont_Q7Z3Z0	KRT25	49 kDa	TRUE	unknown	2.8288	20.369	0
49	TRUE	Empty	Keratin, type II cytoskeletal 74 OS=Homo sapiens OX=9606 GN=KRT74 PE=1 SV=2	Cont_Q7RTS7	KRT74	58 kDa	TRUE	unknown	0	22.22	10.719
50	TRUE	Empty	DNA-directed RNA polymerase subunit beta (Fragment) OS=Moringa oleifera OX=3735 GN=rpoB PE=3 SV=1	A0A1W6C2H8-DECOY		?		unknown	3.7717	18.517	2.1437
51	TRUE	Empty	Keratin, type I cytoskeletal 13 OS=Homo sapiens OX=9606 GN=KRT13 PE=1 SV=4	Cont_P13646	KRT13	50 kDa	TRUE	unknown	1.8859	0	5.7166
52	TRUE	Empty	Keratin, type II cytoskeletal 78 OS=Homo sapiens OX=9606 GN=KRT78 PE=1 SV=2	Cont_Q8N1N4	KRT78	57 kDa	TRUE	unknown	3.7717	22.22	10.004
53	TRUE	Empty	Keratin, type II cytoskeletal 71 OS=Homo sapiens OX=9606 GN=KRT71 PE=1 SV=3	Cont_Q3SY84	KRT71	57 kDa	TRUE	unknown	0	0	10.004
54	TRUE	Empty	Keratin, type I cytoskeletal 42 OS=Mus musculus OX=10090 GN=Krt42 PE=1 SV=1	Cont_Q6IFX2	Krt42	50 kDa	TRUE	unknown	1.8859	0	0
55	TRUE	Empty	Complement C4 (Fragments) OS=Bos taurus OX=9913 GN=C4 PE=1 SV=2	Cont_P01030-DECOY		?		unknown	5.6576	3.7034	4.2875
56	TRUE	Empty	Keratin, type I cytoskeletal 13 OS=Mus musculus OX=10090 GN=Krt13 PE=1 SV=2	Cont_P08730	Krt13	48 kDa	TRUE	unknown	0	5.5551	3.5729
57	TRUE	Empty	Complement C3 OS=Bos taurus OX=9913 GN=C3 PE=1 SV=2	Cont_Q2UVX4-DECOY		?		unknown	3.7717	3.7034	6.4312
58	TRUE	Empty	Keratin, type II cytoskeletal 1b OS=Mus musculus OX=10090 GN=Krt77 PE=1 SV=1	Cont_Q6IFZ6	Krt77	61 kDa	TRUE	unknown	4.7146	0	7.8604
59	TRUE	Empty	Keratin, type II cytoskeletal 73 OS=Homo sapiens OX=9606 GN=KRT73 PE=1 SV=1	Cont_Q86Y46	KRT73	59 kDa	TRUE	unknown	5.6576	0	0
60	TRUE	Empty	Putative LOV domain-containing protein OS=Moringa oleifera OX=3735 PE=2 SV=1	A0A126WVT1-DECOY		?		unknown	0	5.5551	9.2895
61	TRUE	Empty	Lactotransferrin OS=Homo sapiens OX=9606 GN=LTF PE=1 SV=6	Cont_P02788-DECOY		?	TRUE	unknown	3.7717	5.5551	2.8583
62	TRUE	Empty	Collagen alpha-1(III) chain OS=Bos taurus OX=9913 GN=COL3A1 PE=1 SV=1	Cont_P04258-DECOY		?		unknown	9.4293	5.5551	2.1437
63	TRUE	Empty	Keratin type II (Fragment) OS=Mus musculus OX=10090 GN=Krt83 PE=2 SV=1	Cont_Q61726-DECOY		?	TRUE	unknown	0	7.4068	3.5729
64	TRUE	Empty	Keratin, type II cytoskeletal 75 OS=Mus musculus OX=10090 GN=Krt75 PE=1 SV=1	Cont_Q8BGZ7	Krt75	60 kDa	TRUE	unknown	0	20.369	8.5749
65	TRUE	Empty	Beta-galactosidase OS=Escherichia coli (strain K12) OX=83333 GN=lacZ PE=1 SV=2	Cont_P00722	lacZ	116 kDa		unknown	11.315	0	6.4312
66	TRUE	Empty	Clostripain OS=Hathewaya histolytica OX=1498 GN=cloSI PE=1 SV=2	Cont_P09870-DECOY		?		unknown	3.7717	7.4068	7.1458
67	TRUE	Empty	Keratin, type II microfibrillar, component 5 OS=Ovis aries OX=9940 PE=1 SV=1	Cont_P25691		55 kDa	TRUE	unknown	1.8859	0	0
68	TRUE	Empty	Keratin, type II cytoskeletal 4 OS=Mus musculus OX=10090 GN=Krt4 PE=1 SV=2	Cont_P07744-DECOY		?	TRUE	unknown	1.8859	0	5.0021
69	TRUE	Empty	Keratin, type II cuticular Hb4 OS=Homo sapiens OX=9606 GN=KRT84 PE=2 SV=2	Cont_Q9NSB2	KRT84	65 kDa	TRUE	unknown	0	0	4.2875
70	TRUE	Empty	DNA-directed RNA polymerase subunit beta'' OS=Moringa oleifera OX=3735 GN=rpoC2 PE=3 SV=1	A0A482EB30	rpoC2	158 kDa		unknown	3.7717	5.5551	8.5749
71	TRUE	Empty	Keratin, type II cytoskeletal 80 OS=Homo sapiens OX=9606 GN=KRT80 PE=1 SV=2	Cont_Q6KB66	KRT80	51 kDa	TRUE	unknown	0	7.4068	2.8583
72	TRUE	Empty	Fibulin-1 OS=Bos taurus OX=9913 GN=FBLN1 PE=1 SV=1	Cont_A0A3Q1MJB2	FBLN1	77 kDa		unknown	2.8288	0	10.719
73	TRUE	Empty	Keratin, type II cytoskeletal 2 oral OS=Homo sapiens OX=9606 GN=KRT76 PE=1 SV=2	Cont_Q01546	KRT76	66 kDa	TRUE	unknown	0	0	8.5749
74	TRUE	Empty	Alpha,alpha-trehalose-phosphate synthase (UDP-forming) OS=Moringa oleifera OX=3735 PE=2 SV=1	A0A345K449		106 kDa	TRUE	unknown	9.4293	5.5551	4.2875
75	TRUE	Empty	Keratin, type I cytoskeletal 19 OS=Mus musculus OX=10090 GN=Krt19 PE=1 SV=1	Cont_P19001-DECOY		?	TRUE	unknown	11.315	3.7034	2.1437
76	TRUE	Empty	Tropomyosin beta chain OS=Bos taurus OX=9913 GN=TPM2 PE=2 SV=1	Cont_Q5KR48-DECOY		?		unknown	0	0	4.2875
77	TRUE	Empty	Keratin, type II cytoskeletal 4 OS=Mus musculus OX=10090 GN=Krt4 PE=1 SV=2	Cont_P07744	Krt4	56 kDa	TRUE	unknown	0	0	6.4312
78	TRUE	Empty	Keratin, type I cytoskeletal 19 OS=Homo sapiens OX=9606 GN=KRT19 PE=1 SV=4	Cont_P08727	KRT19	44 kDa	TRUE	unknown	1.8859	0	0
79	TRUE	Empty	Keratin, type II cytoskeletal 3 OS=Homo sapiens OX=9606 GN=KRT3 PE=1 SV=3	Cont_P12035	KRT3	64 kDa	TRUE	unknown	0	12.962	8.5749
80	TRUE	Empty	Keratin, type II cuticular Hb5 OS=Homo sapiens OX=9606 GN=KRT85 PE=1 SV=1	Cont_P78386-DECOY		?	TRUE	unknown	3.7717	0	5.0021
81	TRUE	Empty	Keratin, type II cytoskeletal 6B OS=Homo sapiens OX=9606 GN=KRT6B PE=1 SV=5	Cont_P04259-DECOY		?	TRUE	unknown	0	0	3.5729
82	TRUE	Empty	Albumin OS=Bos taurus OX=9913 GN=ALB PE=1 SV=4	Cont_P02769	ALB	69 kDa	TRUE	unknown	2.8288	16.665	3.5729
83	TRUE	Empty	Complement component C7 OS=Bos taurus OX=9913 GN=C7 PE=2 SV=1	Cont_Q29RQ1	C7	93 kDa		unknown	7.5434	7.4068	4.2875
84	TRUE	Empty	Hornerin OS=Homo sapiens OX=9606 GN=HRNR PE=1 SV=2	Cont_Q86YZ3-DECOY		?		unknown	11.315	3.7034	1.4292
85	TRUE	Empty	DNA-directed RNA polymerase subunit beta'' OS=Moringa oleifera OX=3735 GN=rpoC2 PE=3 SV=1	A0A482EB30-DECOY		?		unknown	4.7146	0	2.8583
86	TRUE	Empty	Serotransferrin OS=Homo sapiens OX=9606 GN=TF PE=1 SV=3	Cont_P02787	TF	77 kDa		unknown	8.4863	0	9.2895
87	TRUE	Empty	Keratin, type I cytoskeletal 12 OS=Homo sapiens OX=9606 GN=KRT12 PE=1 SV=1	Cont_Q99456	KRT12	54 kDa	TRUE	unknown	9.4293	0	0
88	TRUE	Empty	Complement component C7 OS=Bos taurus OX=9913 GN=C7 PE=2 SV=1	Cont_Q29RQ1-DECOY		?		unknown	6.6005	5.5551	2.8583
89	TRUE	Empty	Keratin, type II cytoskeletal 3 OS=Homo sapiens OX=9606 GN=KRT3 PE=1 SV=3	Cont_P12035-DECOY		?	TRUE	unknown	1.8859	0	4.2875
90	TRUE	Empty	Keratin, type II cytoskeletal 1 OS=Homo sapiens OX=9606 GN=KRT1 PE=1 SV=6	Cont_P04264-DECOY		?	TRUE	unknown	6.6005	3.7034	2.8583
91	TRUE	Empty	DNA-directed RNA polymerase subunit beta (Fragment) OS=Moringa oleifera OX=3735 GN=rpoB PE=3 SV=1	A0A1W6C2H8	rpoB	121 kDa		unknown	1.8859	3.7034	7.8604
92	TRUE	Empty	Keratin, type II cytoskeletal 5 OS=Homo sapiens OX=9606 GN=KRT5 PE=1 SV=3	Cont_P13647-DECOY		?	TRUE	unknown	0	3.7034	3.5729
93	TRUE	Empty	Keratin, type I cytoskeletal 16 OS=Mus musculus OX=10090 GN=Krt16 PE=1 SV=3	Cont_Q9Z2K1-DECOY		?	TRUE	unknown	1.8859	0	6.4312
94	TRUE	Empty	Keratin, type I cuticular Ha2 OS=Mus musculus OX=10090 GN=Krt32 PE=1 SV=2	Cont_Q62168-DECOY		?	TRUE	unknown	4.7146	0	7.1458
95	TRUE	Empty	Complement C3 OS=Bos taurus OX=9913 GN=C3 PE=1 SV=2	Cont_Q2UVX4	C3	187 kDa		unknown	3.7717	0	3.5729
96	TRUE	Empty	Keratin, type I cytoskeletal 19 OS=Mus musculus OX=10090 GN=Krt19 PE=1 SV=1	Cont_P19001	Krt19	45 kDa	TRUE	unknown	0	0	2.8583
97	TRUE	Empty	Complement C4 (Fragments) OS=Bos taurus OX=9913 GN=C4 PE=1 SV=2	Cont_P01030	C4	102 kDa		unknown	5.6576	5.5551	1.4292
98	TRUE	Empty	ATP synthase subunit beta (Fragment) OS=Moringa oleifera OX=3735 GN=atpB PE=3 SV=1	Q95FP1	atpB	52 kDa		unknown	2.8288	0	7.1458
99	TRUE	Empty	Keratin, type I cytoskeletal 20 OS=Mus musculus OX=10090 GN=Krt20 PE=1 SV=1	Cont_Q9D312	Krt20	49 kDa	TRUE	unknown	13.201	0	0
100	TRUE	Empty	Keratin, type II cytoskeletal 79 OS=Mus musculus OX=10090 GN=Krt79 PE=1 SV=2	Cont_Q8VED5-DECOY		?	TRUE	unknown	0	0	9.2895
101	TRUE	Empty	Trehalose-6-phosphate synthase OS=Moringa oleifera OX=3735 PE=2 SV=1	A0A345K453-DECOY		?	TRUE	unknown	7.5434	3.7034	2.8583
102	TRUE	Empty	Keratin, type II cytoskeletal 1b OS=Mus musculus OX=10090 GN=Krt77 PE=1 SV=1	Cont_Q6IFZ6-DECOY		?	TRUE	unknown	2.8288	9.2585	1.4292
103	TRUE	Empty	Trehalose-6-phosphate synthase OS=Moringa oleifera OX=3735 PE=2 SV=1	A0A345K455-DECOY		?	TRUE	unknown	0	3.7034	5.0021
104	TRUE	Empty	Keratin, type I cytoskeletal 26 OS=Homo sapiens OX=9606 GN=KRT26 PE=1 SV=2	Cont_Q7Z3Y9	KRT26	52 kDa	TRUE	unknown	1.8859	0	0
105	TRUE	Empty	Keratin, type II cuticular Hb2 OS=Homo sapiens OX=9606 GN=KRT82 PE=1 SV=3	Cont_Q9NSB4	KRT82	57 kDa	TRUE	unknown	0	9.2585	5.7166
106	TRUE	Empty	Complement factor I OS=Bos taurus OX=9913 GN=CFI PE=2 SV=1	Cont_Q32PI4	CFI	69 kDa		unknown	2.8288	3.7034	4.2875
107	TRUE	Empty	Keratin, type II cytoskeletal 1b OS=Homo sapiens OX=9606 GN=KRT77 PE=1 SV=3	Cont_Q7Z794	KRT77	62 kDa	TRUE	unknown	4.7146	9.2585	5.7166
108	TRUE	Empty	Alpha-2-macroglobulin OS=Bos taurus OX=9913 GN=A2M PE=1 SV=2	Cont_Q7SIH1-DECOY		?		unknown	6.6005	0	2.8583
109	TRUE	Empty	Trehalose-6-phosphate synthase OS=Moringa oleifera OX=3735 PE=2 SV=1	A0A345K453		98 kDa		unknown	3.7717	0	3.5729
110	TRUE	Empty	Keratin, type II microfibrillar, component 7C OS=Ovis aries OX=9940 PE=1 SV=1	Cont_P15241		54 kDa	TRUE	unknown	2.8288	0	0
111	TRUE	Empty	Inter-alpha-trypsin inhibitor heavy chain H4 OS=Bos taurus OX=9913 GN=ITIH4 PE=1 SV=1	Cont_Q3T052-DECOY		?		unknown	0	11.11	5.0021
112	TRUE	Empty	NAD(P)H-quinone oxidoreductase subunit H, chloroplastic OS=Moringa oleifera OX=3735 GN=ndhH PE=3 SV=1	A0A482EB87-DECOY		?		unknown	5.6576	5.5551	0
113	TRUE	Empty	Keratin, type I cytoskeletal 23 OS=Mus musculus OX=10090 GN=Krt23 PE=1 SV=1	Cont_Q99PS0-DECOY		?	TRUE	unknown	3.7717	0	5.7166
114	TRUE	Empty	Keratin, type I cytoskeletal 23 OS=Mus musculus OX=10090 GN=Krt23 PE=1 SV=1	Cont_Q99PS0	Krt23	48 kDa	TRUE	unknown	3.7717	0	2.8583
115	TRUE	Empty	Keratin, type II cytoskeletal 74 OS=Homo sapiens OX=9606 GN=KRT74 PE=1 SV=2	Cont_Q7RTS7-DECOY		?	TRUE	unknown	0	0	5.0021
116	TRUE	Empty	Keratin, type II cytoskeletal 8 OS=Homo sapiens OX=9606 GN=KRT8 PE=1 SV=7	Cont_P05787-DECOY		?	TRUE	unknown	2.8288	0	2.1437
117	TRUE	Empty	Keratin, type II cytoskeletal 79 OS=Mus musculus OX=10090 GN=Krt79 PE=1 SV=2	Cont_Q8VED5	Krt79	58 kDa	TRUE	unknown	4.7146	0	3.5729
118	TRUE	Empty	Keratin, type II cytoskeletal 5 OS=Mus musculus OX=10090 GN=Krt5 PE=1 SV=1	Cont_Q922U2-DECOY		?	TRUE	unknown	0	0	5.0021
119	TRUE	Empty	Keratin, type II cytoskeletal 75 OS=Mus musculus OX=10090 GN=Krt75 PE=1 SV=1	Cont_Q8BGZ7-DECOY		?	TRUE	unknown	1.8859	0	2.1437
120	TRUE	Empty	Keratin, type II cytoskeletal 6A OS=Mus musculus OX=10090 GN=Krt6a PE=1 SV=3	Cont_P50446-DECOY		?	TRUE	unknown	4.7146	0	4.2875
121	TRUE	Empty	Keratin, type I cuticular Ha5 OS=Homo sapiens OX=9606 GN=KRT35 PE=1 SV=5	Cont_Q92764	KRT35	50 kDa	TRUE	unknown	4.7146	5.5551	2.8583
122	TRUE	Empty	Keratin, type I cytoskeletal 24 OS=Homo sapiens OX=9606 GN=KRT24 PE=1 SV=1	Cont_Q2M2I5	KRT24	55 kDa	TRUE	unknown	0	0	5.7166
123	TRUE	Empty	Serotransferrin OS=Bos taurus OX=9913 GN=TF PE=2 SV=1	Cont_Q29443	TF	78 kDa	TRUE	unknown	7.5434	0	0
124	TRUE	Empty	Complement factor I OS=Bos taurus OX=9913 GN=CFI PE=2 SV=1	Cont_Q32PI4-DECOY		?		unknown	3.7717	0	4.2875
125	TRUE	Empty	Keratin, type II cytoskeletal 71 OS=Mus musculus OX=10090 GN=Krt71 PE=1 SV=1	Cont_Q9R0H5-DECOY		?	TRUE	unknown	3.7717	0	1.4292
126	TRUE	Empty	Serotransferrin OS=Homo sapiens OX=9606 GN=TF PE=1 SV=3	Cont_P02787-DECOY		?		unknown	0	0	5.7166
127	TRUE	Empty	Keratin, type I cuticular Ha1 OS=Mus musculus OX=10090 GN=Krt31 PE=1 SV=2	Cont_Q61765	Krt31	47 kDa	TRUE	unknown	3.7717	0	0
128	TRUE	Empty	Keratin, type II microfibrillar, component 7C OS=Ovis aries OX=9940 PE=1 SV=1	Cont_P15241-DECOY		?	TRUE	unknown	4.7146	0	0
129	TRUE	Empty	Keratin, type II cytoskeletal 75 OS=Homo sapiens OX=9606 GN=KRT75 PE=1 SV=2	Cont_O95678-DECOY		?	TRUE	unknown	1.8859	0	0
130	TRUE	Empty	Keratin, type II cytoskeletal 80 OS=Mus musculus OX=10090 GN=Krt80 PE=1 SV=1	Cont_Q0VBK2	Krt80	51 kDa	TRUE	unknown	1.8859	0	0
131	TRUE	Empty	Gelsolin OS=Bos taurus OX=9913 GN=GSN PE=2 SV=1	Cont_Q3SX14	GSN	81 kDa		unknown	3.7717	3.7034	3.5729
132	TRUE	Empty	Keratin, type II cytoskeletal 2 epidermal OS=Mus musculus OX=10090 GN=Krt2 PE=1 SV=1	Cont_Q3TTY5-DECOY		?	TRUE	unknown	3.7717	7.4068	2.1437
133	TRUE	Empty	Complement component C9 OS=Bos taurus OX=9913 GN=C9 PE=2 SV=1	Cont_Q3MHN2	C9	62 kDa		unknown	0	0	2.1437
134	TRUE	Empty	Keratin, type I cytoskeletal 26 OS=Homo sapiens OX=9606 GN=KRT26 PE=1 SV=2	Cont_Q7Z3Y9-DECOY		?	TRUE	unknown	0	5.5551	2.8583
135	TRUE	Empty	Complement factor H OS=Bos taurus OX=9913 GN=CFH PE=1 SV=3	Cont_Q28085-DECOY		?		unknown	3.7717	0	0
136	TRUE	Empty	Keratin, type I cytoskeletal 18 OS=Mus musculus OX=10090 GN=Krt18 PE=1 SV=5	Cont_P05784	Krt18	48 kDa	TRUE	unknown	1.8859	0	2.1437
137	TRUE	Empty	Keratin, type II cytoskeletal 4 OS=Homo sapiens OX=9606 GN=KRT4 PE=1 SV=5	Cont_P19013	KRT4	56 kDa	TRUE	unknown	2.8288	0	0
138	TRUE	Empty	Keratin, type I cuticular Ha6 OS=Homo sapiens OX=9606 GN=KRT36 PE=1 SV=1	Cont_O76013	KRT36	52 kDa	TRUE	unknown	3.7717	0	0
139	TRUE	Empty	Alpha,alpha-trehalose-phosphate synthase (UDP-forming) OS=Moringa oleifera OX=3735 PE=2 SV=1	A0A345K449-DECOY		?	TRUE	unknown	4.7146	0	0
140	TRUE	Empty	Trehalose-6-phosphate synthase OS=Moringa oleifera OX=3735 PE=2 SV=1	A0A345K451-DECOY		?	TRUE	unknown	1.8859	0	1.4292
141	TRUE	Empty	Keratin, type I cuticular Ha5 OS=Mus musculus OX=10090 GN=Krt35 PE=1 SV=1	Cont_Q497I4-DECOY		?	TRUE	unknown	6.6005	0	0
142	TRUE	Empty	Trehalose-6-phosphate synthase OS=Moringa oleifera OX=3735 PE=2 SV=1	A0A345K454-DECOY		?	TRUE	unknown	4.7146	0	2.8583
143	TRUE	Empty	50S ribosomal protein L22, chloroplastic OS=Moringa oleifera OX=3735 GN=rpl22 PE=3 SV=1	A0A482EBP8	rpl22	18 kDa		unknown	1.8859	0	4.2875
144	TRUE	Empty	IF rod domain-containing protein OS=Bos taurus OX=9913 GN=KRT76 PE=3 SV=3	Cont_E1BIL2-DECOY		?	TRUE	unknown	1.8859	3.7034	2.8583
145	TRUE	Empty	HGF activator OS=Bos taurus OX=9913 GN=HGFAC PE=4 SV=3	Cont_E1BCW0	HGFAC	70 kDa		unknown	0	0	8.5749
146	TRUE	Empty	Keratin, type II cytoskeletal 79 OS=Homo sapiens OX=9606 GN=KRT79 PE=1 SV=2	Cont_Q5XKE5	KRT79	58 kDa	TRUE	unknown	1.8859	0	5.0021
147	TRUE	Empty	Hemopexin OS=Bos taurus OX=9913 GN=HPX PE=2 SV=1	Cont_Q3SZV7	HPX	52 kDa		unknown	0	0	6.4312
148	TRUE	Empty	Fibrinogen alpha chain OS=Bos taurus OX=9913 GN=FGA PE=1 SV=5	Cont_P02672-DECOY		?		unknown	0	0	4.2875
149	TRUE	Empty	Keratin, type II cytoskeletal 4 OS=Homo sapiens OX=9606 GN=KRT4 PE=1 SV=5	Cont_P19013-DECOY		?	TRUE	unknown	0	0	2.1437
150	TRUE	Empty	50S ribosomal protein L2, chloroplastic OS=Moringa oleifera OX=3735 GN=rpl2 PE=3 SV=1	A0A482EBH6-DECOY		?		unknown	5.6576	0	0
151	TRUE	Empty	Coagulation factor XIII B chain OS=Bos taurus OX=9913 GN=F13B PE=2 SV=1	Cont_Q2TBQ1	F13B	75 kDa		unknown	4.7146	5.5551	0
152	TRUE	Empty	Inter-alpha-trypsin inhibitor heavy chain H1 OS=Bos taurus OX=9913 GN=ITIH1 PE=1 SV=1	Cont_Q0VCM5-DECOY		?		unknown	0	0	2.1437
153	TRUE	Empty	Keratin, type I cuticular Ha4 OS=Mus musculus OX=10090 GN=Krt34 PE=2 SV=1	Cont_Q9D646-DECOY		?	TRUE	unknown	6.6005	0	2.8583
154	TRUE	Empty	Keratin, type I cytoskeletal 14 OS=Homo sapiens OX=9606 GN=KRT14 PE=1 SV=4	Cont_P02533-DECOY		?	TRUE	unknown	5.6576	0	2.1437
155	TRUE	Empty	Keratin, type I cuticular Ha2 OS=Homo sapiens OX=9606 GN=KRT32 PE=1 SV=3	Cont_Q14532	KRT32	50 kDa	TRUE	unknown	0	0	2.8583
156	TRUE	Empty	Keratin, type I cytoskeletal 17 OS=Mus musculus OX=10090 GN=Krt17 PE=1 SV=3	Cont_Q9QWL7-DECOY		?	TRUE	unknown	0	0	3.5729
157	TRUE	Empty	Glutamate dehydrogenase 1, mitochondrial OS=Bos taurus OX=9913 GN=GLUD1 PE=1 SV=2	Cont_P00366-DECOY		?		unknown	3.7717	3.7034	2.1437
158	TRUE	Empty	Trehalose-6-phosphate synthase OS=Moringa oleifera OX=3735 PE=2 SV=1	A0A345K455		96 kDa		unknown	1.8859	0	2.8583
159	TRUE	Empty	Putative LOV domain-containing protein OS=Moringa oleifera OX=3735 PE=2 SV=1	A0A126WWV6		68 kDa		unknown	0	3.7034	1.4292
160	TRUE	Empty	Keratin, type I cytoskeletal 9 OS=Homo sapiens OX=9606 GN=KRT9 PE=1 SV=3	Cont_P35527-DECOY		?		unknown	6.6005	0	2.1437
161	TRUE	Empty	Keratin, type II cytoskeletal 78 OS=Homo sapiens OX=9606 GN=KRT78 PE=1 SV=2	Cont_Q8N1N4-DECOY		?	TRUE	unknown	1.8859	0	0
162	TRUE	Empty	Keratin, type II cytoskeletal 72 OS=Mus musculus OX=10090 GN=Krt72 PE=3 SV=1	Cont_Q6IME9-DECOY		?	TRUE	unknown	2.8288	0	0
163	TRUE	Empty	Cartilage oligomeric matrix protein OS=Bos taurus OX=9913 GN=COMP PE=1 SV=2	Cont_P35445	COMP	82 kDa		unknown	1.8859	0	7.1458
164	TRUE	Empty	Putative LOV domain-containing protein OS=Moringa oleifera OX=3735 PE=2 SV=1	A0A126WVS6-DECOY		?		unknown	4.7146	0	2.1437
165	TRUE	Empty	Hemopexin OS=Bos taurus OX=9913 GN=HPX PE=2 SV=1	Cont_Q3SZV7-DECOY		?		unknown	2.8288	5.5551	2.1437
166	TRUE	Empty	Putative LOV domain-containing protein OS=Moringa oleifera OX=3735 PE=2 SV=1	A0A126WVS6		44 kDa		unknown	3.7717	0	1.4292
167	TRUE	Empty	Keratin, type II cytoskeletal 79 OS=Homo sapiens OX=9606 GN=KRT79 PE=1 SV=2	Cont_Q5XKE5-DECOY		?	TRUE	unknown	0	0	2.8583
168	TRUE	Empty	ApoN protein OS=Bos taurus OX=9913 GN=APON PE=2 SV=1	Cont_Q2KIH2	APON	29 kDa		unknown	0	0	2.1437
169	TRUE	Empty	Serotransferrin-like OS=Bos taurus OX=9913 GN=LOC525947 PE=2 SV=1	Cont_Q2HJF0-DECOY		?		unknown	3.7717	0	0
170	TRUE	Empty	Keratin, type II cuticular Hb2 OS=Homo sapiens OX=9606 GN=KRT82 PE=1 SV=3	Cont_Q9NSB4-DECOY		?	TRUE	unknown	1.8859	0	2.1437
171	TRUE	Empty	Keratin, type II cytoskeletal 7 OS=Mus musculus OX=10090 GN=Krt7 PE=1 SV=1	Cont_Q9DCV7-DECOY		?	TRUE	unknown	0	0	5.0021
172	TRUE	Empty	Carboxypeptidase N catalytic chain OS=Bos taurus OX=9913 GN=CPN1 PE=2 SV=1	Cont_Q2KJ83-DECOY		?		unknown	0	0	3.5729
173	TRUE	Empty	Maturase K OS=Moringa oleifera OX=3735 GN=matK PE=3 SV=1	A0A482EC98	matK	60 kDa	TRUE	unknown	0	5.5551	2.1437
174	TRUE	Empty	DNA-directed RNA polymerase subunit beta' OS=Moringa oleifera OX=3735 GN=rpoC1 PE=3 SV=1	A0A4Y5PRN1	rpoC1	79 kDa		unknown	4.7146	5.5551	2.8583
175	TRUE	Empty	Ribosomal protein S3 (Fragment) OS=Moringa oleifera OX=3735 GN=rps3 PE=3 SV=1	A0A142I7W7-DECOY		?		unknown	0	0	2.1437
176	TRUE	Empty	Periostin OS=Bos taurus OX=9913 GN=POSTN PE=1 SV=1	Cont_Q2KJC7	POSTN	87 kDa		unknown	3.7717	3.7034	2.1437
177	TRUE	Empty	IF rod domain-containing protein OS=Bos taurus OX=9913 GN=KRT76 PE=3 SV=3	Cont_E1BIL2	KRT76	63 kDa	TRUE	unknown	0	0	5.7166
178	TRUE	Empty	Albumin OS=Bos taurus OX=9913 GN=ALB PE=1 SV=4	Cont_P02769-DECOY		?	TRUE	unknown	0	0	2.1437
179	TRUE	Empty	Glucose-6-phosphate isomerase OS=Bos taurus OX=9913 GN=GPI PE=2 SV=4	Cont_Q3ZBD7-DECOY		?		unknown	2.8288	0	2.1437
180	TRUE	Empty	Alpha-fetoprotein OS=Bos taurus OX=9913 GN=AFP PE=2 SV=1	Cont_Q3SZ57	AFP	69 kDa		unknown	2.8288	0	1.4292
181	TRUE	Empty	Albumin OS=Homo sapiens OX=9606 GN=ALB PE=1 SV=2	Cont_P02768	ALB	69 kDa	TRUE	unknown	2.8288	0	2.1437
182	TRUE	Empty	Putative keratin-87 protein OS=Homo sapiens OX=9606 GN=KRT87P PE=5 SV=4	Cont_A6NCN2-DECOY		?	TRUE	unknown	0	3.7034	0
183	TRUE	Empty	Keratin, type I cytoskeletal 23 OS=Homo sapiens OX=9606 GN=KRT23 PE=1 SV=2	Cont_Q9C075	KRT23	48 kDa	TRUE	unknown	4.7146	0	1.4292
184	TRUE	Empty	Cartilage oligomeric matrix protein OS=Bos taurus OX=9913 GN=COMP PE=1 SV=2	Cont_P35445-DECOY		?		unknown	2.8288	0	5.0021
185	TRUE	Empty	Ovalbumin OS=Gallus gallus OX=9031 GN=SERPINB14 PE=1 SV=2	Cont_P01012	SERPINB14	43 kDa		unknown	8.4863	0	2.1437
186	TRUE	Empty	Complement component C9 OS=Bos taurus OX=9913 GN=C9 PE=2 SV=1	Cont_Q3MHN2-DECOY		?		unknown	5.6576	0	0
187	TRUE	Empty	Keratin, type I cuticular Ha7 OS=Homo sapiens OX=9606 GN=KRT37 PE=1 SV=3	Cont_O76014	KRT37	50 kDa	TRUE	unknown	3.7717	0	2.8583
188	TRUE	Empty	Keratin, type I cuticular Ha1 OS=Homo sapiens OX=9606 GN=KRT31 PE=1 SV=3	Cont_Q15323	KRT31	47 kDa	TRUE	unknown	5.6576	0	0
189	TRUE	Empty	Beta-lactoglobulin OS=Bos taurus OX=9913 GN=LGB PE=1 SV=3	Cont_P02754	LGB	20 kDa		unknown	0	12.962	2.8583
190	TRUE	Empty	Prothrombin OS=Bos taurus OX=9913 GN=F2 PE=1 SV=2	Cont_P00735	F2	71 kDa		unknown	0	5.5551	2.1437
191	TRUE	Empty	Glutamate dehydrogenase 1, mitochondrial OS=Bos taurus OX=9913 GN=GLUD1 PE=1 SV=2	Cont_P00366	GLUD1	62 kDa		unknown	4.7146	0	2.8583
192	TRUE	Empty	Keratin, type I cuticular Ha7 OS=Homo sapiens OX=9606 GN=KRT37 PE=1 SV=3	Cont_O76014-DECOY		?	TRUE	unknown	6.6005	3.7034	2.1437
193	TRUE	Empty	Ribulose bisphosphate carboxylase large chain (Fragment) OS=Moringa oleifera OX=3735 GN=rbcL PE=3 SV=1	A0A1W6C2G5 (+1)	rbcL	53 kDa	TRUE	unknown	0	0	2.1437
194	TRUE	Empty	Keratin, type I cuticular Ha4 OS=Homo sapiens OX=9606 GN=KRT34 PE=1 SV=2	Cont_O76011	KRT34	49 kDa	TRUE	unknown	2.8288	0	2.8583
195	TRUE	Empty	Beta-galactosidase OS=Escherichia coli (strain K12) OX=83333 GN=lacZ PE=1 SV=2	Cont_P00722-DECOY		?		unknown	4.7146	0	2.8583
196	TRUE	Empty	Antithrombin-III OS=Bos taurus OX=9913 GN=SERPINC1 PE=1 SV=2	Cont_P41361	SERPINC1	52 kDa		unknown	2.8288	0	1.4292
197	TRUE	Empty	Keratin, type I cytoskeletal 19 OS=Homo sapiens OX=9606 GN=KRT19 PE=1 SV=4	Cont_P08727-DECOY		?	TRUE	unknown	3.7717	0	1.4292
198	TRUE	Empty	Peptidyl-Asp metalloendopeptidase (Fragments) OS=Pseudomonas fragi OX=296 PE=1 SV=2	Cont_Q9R4J4		16 kDa		unknown	0	0	2.8583
199	TRUE	Empty	Plasminogen OS=Bos taurus OX=9913 GN=PLG PE=1 SV=2	Cont_P06868	PLG	91 kDa		unknown	3.7717	0	0
200	TRUE	Empty	Alpha-fetoprotein OS=Bos taurus OX=9913 GN=AFP PE=2 SV=1	Cont_Q3SZ57-DECOY		?		unknown	1.8859	0	0
201	TRUE	Empty	Inter-alpha-trypsin inhibitor heavy chain H3 OS=Bos taurus OX=9913 GN=ITIH3 PE=1 SV=2	Cont_P56652-DECOY		?		unknown	3.7717	0	0
202	TRUE	Empty	Keratin, type II cytoskeletal 7 OS=Homo sapiens OX=9606 GN=KRT7 PE=1 SV=5	Cont_P08729-DECOY		?	TRUE	unknown	2.8288	0	1.4292
203	TRUE	Empty	Keratin, type I cuticular Ha3-I OS=Homo sapiens OX=9606 GN=KRT33A PE=2 SV=2	Cont_O76009-DECOY		?	TRUE	unknown	3.7717	0	2.1437
204	TRUE	Empty	Alpha,alpha-trehalose-phosphate synthase (UDP-forming) OS=Moringa oleifera OX=3735 PE=2 SV=1	A0A345K448		104 kDa	TRUE	unknown	1.8859	3.7034	2.1437
205	TRUE	Empty	Phytochrome A (Fragment) OS=Moringa oleifera OX=3735 GN=PHYA PE=3 SV=1	E7CHL0-DECOY		?		unknown	0	0	1.4292
206	TRUE	Empty	Keratin, type I cytoskeletal 24 OS=Homo sapiens OX=9606 GN=KRT24 PE=1 SV=1	Cont_Q2M2I5-DECOY		?	TRUE	unknown	0	0	4.2875
207	TRUE	Empty	Keratin, type I cytoskeletal 15 OS=Ovis aries OX=9940 GN=KRT15 PE=2 SV=1	Cont_O77727-DECOY		?	TRUE	unknown	2.8288	0	3.5729
208	TRUE	Empty	Keratin, type II cytoskeletal 2 oral OS=Homo sapiens OX=9606 GN=KRT76 PE=1 SV=2	Cont_Q01546-DECOY		?	TRUE	unknown	0	0	5.0021
209	TRUE	Empty	Keratin, type II cuticular Hb4 OS=Homo sapiens OX=9606 GN=KRT84 PE=2 SV=2	Cont_Q9NSB2-DECOY		?	TRUE	unknown	2.8288	0	2.1437
210	TRUE	Empty	Keratin, type I cytoskeletal 39 OS=Homo sapiens OX=9606 GN=KRT39 PE=1 SV=2	Cont_Q6A163-DECOY		?	TRUE	unknown	0	0	2.8583
211	TRUE	Empty	Plasminogen OS=Bos taurus OX=9913 GN=PLG PE=1 SV=2	Cont_P06868-DECOY		?		unknown	2.8288	0	4.2875
212	TRUE	Empty	Inter-alpha-trypsin inhibitor heavy chain H1 OS=Bos taurus OX=9913 GN=ITIH1 PE=1 SV=1	Cont_Q0VCM5	ITIH1	101 kDa		unknown	3.7717	0	0
213	TRUE	Empty	Apolipoprotein E OS=Bos taurus OX=9913 GN=APOE PE=1 SV=1	Cont_Q03247-DECOY		?		unknown	2.8288	3.7034	2.8583
214	TRUE	Empty	Prothrombin OS=Bos taurus OX=9913 GN=F2 PE=1 SV=2	Cont_P00735-DECOY		?		unknown	0	0	2.1437
215	TRUE	Empty	Keratin, type I cytoskeletal 23 OS=Homo sapiens OX=9606 GN=KRT23 PE=1 SV=2	Cont_Q9C075-DECOY		?	TRUE	unknown	1.8859	0	2.1437
216	TRUE	Empty	Fibrinogen beta chain OS=Bos taurus OX=9913 GN=FGB PE=1 SV=2	Cont_P02676	FGB	53 kDa		unknown	7.5434	0	1.4292
217	TRUE	Empty	Keratin, type II cytoskeletal 1b OS=Homo sapiens OX=9606 GN=KRT77 PE=1 SV=3	Cont_Q7Z794-DECOY		?	TRUE	unknown	7.5434	0	0
218	TRUE	Empty	Glucose-6-phosphate isomerase OS=Bos taurus OX=9913 GN=GPI PE=2 SV=4	Cont_Q3ZBD7	GPI	63 kDa		unknown	0	0	2.8583
219	TRUE	Empty	Keratin-like protein KRT222 OS=Homo sapiens OX=9606 GN=KRT222 PE=1 SV=1	Cont_Q8N1A0-DECOY		?	TRUE	unknown	0	0	3.5729
220	TRUE	Empty	Streptavidin OS=Streptomyces avidinii OX=1895 PE=1 SV=1	Cont_P22629		19 kDa		unknown	0	11.11	7.1458
221	TRUE	Empty	Keratin-associated protein 6-1 OS=Homo sapiens OX=9606 GN=KRTAP6-1 PE=1 SV=1	Cont_Q3LI64	KRTAP6-1	7 kDa		unknown	0	0	5.0021
222	TRUE	Empty	C4b-binding protein alpha chain OS=Bos taurus OX=9913 GN=C4BPA PE=2 SV=1	Cont_Q28065-DECOY		?		unknown	2.8288	0	1.4292
223	TRUE	Empty	Keratin, type I cuticular Ha2 OS=Mus musculus OX=10090 GN=Krt32 PE=1 SV=2	Cont_Q62168	Krt32	46 kDa	TRUE	unknown	2.8288	0	0
224	TRUE	Empty	Keratin, type I cytoskeletal 39 OS=Mus musculus OX=10090 GN=Krt39 PE=2 SV=2	Cont_Q6IFX4-DECOY		?	TRUE	unknown	2.8288	0	2.1437
225	TRUE	Empty	Ribosomal protein S3 (Fragment) OS=Moringa oleifera OX=3735 GN=rps3 PE=3 SV=1	A0A142I7W7	rps3	55 kDa		unknown	0	9.2585	2.8583
226	TRUE	Empty	Albumin OS=Homo sapiens OX=9606 GN=ALB PE=1 SV=2	Cont_P02768-DECOY		?	TRUE	unknown	0	0	3.5729
227	TRUE	Empty	Trehalose-6-phosphate synthase OS=Moringa oleifera OX=3735 PE=2 SV=1	A0A345K450-DECOY		?	TRUE	unknown	1.8859	0	0
228	TRUE	Empty	Keratin, type I microfibrillar, 47.6 kDa OS=Ovis aries OX=9940 PE=3 SV=2	Cont_P25690-DECOY		?	TRUE	unknown	2.8288	0	3.5729
229	TRUE	Empty	Gelsolin OS=Bos taurus OX=9913 GN=GSN PE=2 SV=1	Cont_Q3SX14-DECOY		?		unknown	3.7717	0	0
230	TRUE	Empty	GDP-mannose 3,5-epimerase (Fragment) OS=Moringa oleifera OX=3735 GN=GME PE=2 SV=1	A0A097ZMQ0	GME	31 kDa		unknown	2.8288	7.4068	2.1437
231	TRUE	Empty	Keratin, type I cytoskeletal 18 OS=Homo sapiens OX=9606 GN=KRT18 PE=1 SV=2	Cont_P05783-DECOY		?	TRUE	unknown	0	3.7034	2.8583
232	TRUE	Empty	Fibrinogen beta chain OS=Bos taurus OX=9913 GN=FGB PE=1 SV=2	Cont_P02676-DECOY		?		unknown	5.6576	3.7034	0
233	TRUE	Empty	30S ribosomal protein S19, chloroplastic OS=Moringa oleifera OX=3735 GN=rps19 PE=3 SV=1	A0A482EB71-DECOY		?		unknown	4.7146	0	0
234	TRUE	Empty	Protease 1 OS=Achromobacter lyticus OX=224 PE=1 SV=1	Cont_P15636-DECOY		?		unknown	5.6576	0	2.1437
235	TRUE	Empty	C4b-binding protein alpha chain OS=Bos taurus OX=9913 GN=C4BPA PE=2 SV=1	Cont_Q28065	C4BPA	69 kDa		unknown	2.8288	0	1.4292
236	TRUE	Empty	ATP synthase subunit beta, chloroplastic OS=Moringa oleifera OX=3735 GN=atpB PE=3 SV=1	A0A482EB88-DECOY		?		unknown	0	0	4.2875
237	TRUE	Empty	Keratin, type I cuticular Ha3-I OS=Homo sapiens OX=9606 GN=KRT33A PE=2 SV=2	Cont_O76009	KRT33A	46 kDa	TRUE	unknown	2.8288	0	0
238	TRUE	Empty	Ovalbumin OS=Gallus gallus OX=9031 GN=SERPINB14 PE=1 SV=2	Cont_P01012-DECOY		?		unknown	0	0	2.1437
239	TRUE	Empty	Carboxypeptidase N catalytic chain OS=Bos taurus OX=9913 GN=CPN1 PE=2 SV=1	Cont_Q2KJ83	CPN1	53 kDa		unknown	0	3.7034	2.8583
240	TRUE	Empty	Phytochrome A (Fragment) OS=Moringa oleifera OX=3735 GN=PHYA PE=3 SV=1	E7CHL0	PHYA	67 kDa		unknown	0	0	2.8583
241	TRUE	Empty	Clostripain OS=Hathewaya histolytica OX=1498 GN=cloSI PE=1 SV=2	Cont_P09870	cloSI	60 kDa		unknown	2.8288	3.7034	1.4292
242	TRUE	Empty	Keratin, type II cytoskeletal 80 OS=Mus musculus OX=10090 GN=Krt80 PE=1 SV=1	Cont_Q0VBK2-DECOY		?	TRUE	unknown	2.8288	0	1.4292
243	TRUE	Empty	HGF activator OS=Bos taurus OX=9913 GN=HGFAC PE=4 SV=3	Cont_E1BCW0-DECOY		?		unknown	0	0	2.8583
244	TRUE	Empty	Keratin, type II cytoskeletal 80 OS=Homo sapiens OX=9606 GN=KRT80 PE=1 SV=2	Cont_Q6KB66-DECOY		?	TRUE	unknown	3.7717	0	1.4292
245	TRUE	Empty	Keratin, type I cytoskeletal 20 OS=Mus musculus OX=10090 GN=Krt20 PE=1 SV=1	Cont_Q9D312-DECOY		?		unknown	4.7146	0	1.4292
246	TRUE	Empty	Keratin, type I cuticular Ha6 OS=Homo sapiens OX=9606 GN=KRT36 PE=1 SV=1	Cont_O76013-DECOY		?	TRUE	unknown	4.7146	0	0
247	TRUE	Empty	Keratin, type I cytoskeletal 28 OS=Homo sapiens OX=9606 GN=KRT28 PE=1 SV=2	Cont_Q7Z3Y7-DECOY		?	TRUE	unknown	2.8288	0	0
248	TRUE	Empty	Keratin-like protein KRT222 OS=Homo sapiens OX=9606 GN=KRT222 PE=1 SV=1	Cont_Q8N1A0 (+1)	KRT222	34 kDa	TRUE	unknown	2.8288	0	0
249	TRUE	Empty	Kininogen-2 OS=Bos taurus OX=9913 GN=KNG2 PE=1 SV=1	Cont_P01045-DECOY		?	TRUE	unknown	0	0	2.1437
250	TRUE	Empty	Major capsid protein OS=Saccharomyces cerevisiae virus L-A OX=11008 GN=gag PE=1 SV=1	Cont_P32503-DECOY		?		unknown	3.7717	0	1.4292
251	TRUE	Empty	Alpha-amylase OS=Bos taurus OX=9913 GN=AMY2A PE=2 SV=1	Cont_Q3MHH8	AMY2A	57 kDa		unknown	4.7146	0	2.8583
252	TRUE	Empty	Carboxypeptidase B2 OS=Bos taurus OX=9913 GN=CPB2 PE=1 SV=1	Cont_Q2KIG3-DECOY		?		unknown	3.7717	0	2.1437
253	TRUE	Empty	Keratin, type I cuticular Ha2 OS=Homo sapiens OX=9606 GN=KRT32 PE=1 SV=3	Cont_Q14532-DECOY		?	TRUE	unknown	0	0	2.1437
254	TRUE	Empty	Apolipoprotein E OS=Bos taurus OX=9913 GN=APOE PE=1 SV=1	Cont_Q03247	APOE	36 kDa		unknown	2.8288	0	3.5729
255	TRUE	Empty	Fructose-bisphosphate aldolase A OS=Oryctolagus cuniculus OX=9986 GN=ALDOA PE=1 SV=2	Cont_P00883	ALDOA	39 kDa		unknown	0	0	1.4292
256	TRUE	Empty	Keratin, type I cytoskeletal 42 OS=Mus musculus OX=10090 GN=Krt42 PE=1 SV=1	Cont_Q6IFX2-DECOY		?	TRUE	unknown	2.8288	0	0
257	TRUE	Empty	Keratin, type I cuticular Ha5 OS=Homo sapiens OX=9606 GN=KRT35 PE=1 SV=5	Cont_Q92764-DECOY		?	TRUE	unknown	2.8288	0	0
258	TRUE	Empty	Alpha,alpha-trehalose-phosphate synthase (UDP-forming) OS=Moringa oleifera OX=3735 PE=2 SV=1	A0A345K448-DECOY		?	TRUE	unknown	1.8859	0	1.4292
259	TRUE	Empty	Alpha-1B-glycoprotein OS=Bos taurus OX=9913 GN=A1BG PE=1 SV=1	Cont_Q2KJF1	A1BG	54 kDa		unknown	1.8859	0	2.1437
260	TRUE	Empty	Actin (Fragment) OS=Moringa oleifera OX=3735 PE=2 SV=1	I0AY55		32 kDa		unknown	2.8288	0	1.4292
261	TRUE	Empty	Keratin, type I cytoskeletal 13 OS=Mus musculus OX=10090 GN=Krt13 PE=1 SV=2	Cont_P08730-DECOY		?	TRUE	unknown	1.8859	0	0
262	TRUE	Empty	30S ribosomal protein S18, chloroplastic OS=Moringa oleifera OX=3735 GN=rps18 PE=3 SV=1	A0A482EBH5	rps18	12 kDa		unknown	0	5.5551	1.4292
263	TRUE	Empty	Isoform 2 of Keratin, type I cytoskeletal 15 OS=Homo sapiens OX=9606 GN=KRT15	Cont_P19012-2-DECOY		?	TRUE	unknown	0	0	1.4292
264	TRUE	Empty	Alpha-2-antiplasmin OS=Bos taurus OX=9913 GN=SERPINF2 PE=1 SV=2	Cont_P28800-DECOY		?		unknown	4.7146	0	0
265	TRUE	Empty	Keratin, type II cytoskeletal 72 OS=Homo sapiens OX=9606 GN=KRT72 PE=1 SV=2	Cont_Q14CN4-DECOY		?	TRUE	unknown	0	0	2.8583
266	TRUE	Empty	Keratin, type I cuticular Ha4 OS=Homo sapiens OX=9606 GN=KRT34 PE=1 SV=2	Cont_O76011-DECOY		?	TRUE	unknown	0	0	3.5729
267	TRUE	Empty	Keratin, type I cytoskeletal 20 OS=Homo sapiens OX=9606 GN=KRT20 PE=1 SV=1	Cont_P35900-DECOY		?	TRUE	unknown	0	3.7034	0
268	TRUE	Empty	Isoform 2 of Tropomyosin beta chain OS=Bos taurus OX=9913 GN=TPM2	Cont_Q5KR48-2	TPM2	33 kDa	TRUE	unknown	0	3.7034	0
269	TRUE	Empty	Clusterin OS=Bos taurus OX=9913 GN=CLU PE=1 SV=1	Cont_P17697-DECOY		?		unknown	1.8859	0	2.1437
270	TRUE	Empty	Adiponectin OS=Bos taurus OX=9913 GN=ADIPOQ PE=1 SV=1	Cont_Q3Y5Z3	ADIPOQ	26 kDa		unknown	0	3.7034	3.5729
271	TRUE	Empty	Cationic trypsin OS=Bos taurus OX=9913 PE=1 SV=3	Cont_P00760		26 kDa		unknown	2.8288	0	2.1437
272	TRUE	Empty	Protein AMBP OS=Bos taurus OX=9913 GN=AMBP PE=1 SV=2	Cont_P00978	AMBP	39 kDa		unknown	0	0	2.1437
273	TRUE	Empty	Alpha-2-antiplasmin OS=Bos taurus OX=9913 GN=SERPINF2 PE=1 SV=2	Cont_P28800	SERPINF2	55 kDa		unknown	0	0	2.1437
274	TRUE	Empty	Keratin, type I cytoskeletal 15 OS=Homo sapiens OX=9606 GN=KRT15 PE=1 SV=3	Cont_P19012-DECOY		?	TRUE	unknown	2.8288	0	0
275	TRUE	Empty	30S ribosomal protein S7, chloroplastic OS=Moringa oleifera OX=3735 GN=rps7 PE=3 SV=1	A0A482EB78	rps7	17 kDa		unknown	0	0	1.4292
276	TRUE	Empty	Carboxypeptidase B2 OS=Bos taurus OX=9913 GN=CPB2 PE=1 SV=1	Cont_Q2KIG3	CPB2	49 kDa		unknown	2.8288	0	3.5729
277	TRUE	Empty	Tropomyosin beta chain OS=Bos taurus OX=9913 GN=TPM2 PE=2 SV=1	Cont_Q5KR48	TPM2	33 kDa	TRUE	unknown	1.8859	0	0
278	TRUE	Empty	Carbonic anhydrase 2 OS=Bos taurus OX=9913 GN=CA2 PE=1 SV=3	Cont_P00921-DECOY		?		unknown	1.8859	0	1.4292
279	TRUE	Empty	Trehalose-6-phosphate synthase OS=Moringa oleifera OX=3735 PE=2 SV=1	A0A345K452-DECOY		?	TRUE	unknown	0	5.5551	0
280	TRUE	Empty	Acetyl-coenzyme A carboxylase carboxyl transferase subunit beta, chloroplastic OS=Moringa oleifera OX=3735 GN=accD PE=3 SV=1	A0A482EBN2-DECOY		?		unknown	1.8859	0	2.8583
281	TRUE	Empty	Apolipoprotein A-I OS=Bos taurus OX=9913 GN=APOA1 PE=1 SV=3	Cont_P15497	APOA1	30 kDa		unknown	0	0	1.4292
282	TRUE	Empty	Alpha-amylase OS=Bos taurus OX=9913 GN=AMY2A PE=2 SV=1	Cont_Q3MHH8-DECOY		?		unknown	2.8288	0	0
283	TRUE	Empty	50S ribosomal protein L16, chloroplastic OS=Moringa oleifera OX=3735 GN=rpl16 PE=3 SV=1	A0A482EBB1-DECOY		?		unknown	0	0	3.5729
284	TRUE	Empty	Tubulin beta chain OS=Bos taurus OX=9913 GN=TUBB1 PE=3 SV=1	Cont_E1BJK2	TUBB1	50 kDa		unknown	1.8859	0	0
285	TRUE	Empty	Apolipoprotein A-I OS=Bos taurus OX=9913 GN=APOA1 PE=1 SV=3	Cont_P15497-DECOY		?		unknown	0	0	2.1437
286	TRUE	Empty	ATP synthase subunit alpha, chloroplastic OS=Moringa oleifera OX=3735 GN=atpA PE=3 SV=1	A0A482ECG6	atpA	55 kDa		unknown	1.8859	0	2.1437
287	TRUE	Empty	Pigment epithelium-derived factor OS=Bos taurus OX=9913 GN=SERPINF1 PE=1 SV=1	Cont_Q95121-DECOY		?		unknown	0	0	2.8583
288	TRUE	Empty	Serpin A3-4 OS=Bos taurus OX=9913 GN=SERPINA3-4 PE=3 SV=1	Cont_A2I7N0-DECOY		?	TRUE	unknown	1.8859	0	0
289	TRUE	Empty	30S ribosomal protein S12, chloroplastic OS=Moringa oleifera OX=3735 GN=rps12 PE=3 SV=1	A0A482ECX4-DECOY		?		unknown	0	0	2.8583
290	TRUE	Empty	Vitamin K-dependent protein S OS=Bos taurus OX=9913 GN=PROS1 PE=1 SV=1	Cont_P07224-DECOY		?		unknown	1.8859	0	2.1437
291	TRUE	Empty	Vitamin K-dependent protein S OS=Bos taurus OX=9913 GN=PROS1 PE=1 SV=1	Cont_P07224	PROS1	75 kDa		unknown	0	0	1.4292
292	TRUE	Empty	NAD(P)H-quinone oxidoreductase subunit H, chloroplastic OS=Moringa oleifera OX=3735 GN=ndhH PE=3 SV=1	A0A482EB87	ndhH	46 kDa		unknown	5.6576	0	0
293	TRUE	Empty	Protease 1 OS=Achromobacter lyticus OX=224 PE=1 SV=1	Cont_P15636		68 kDa		unknown	1.8859	3.7034	0
294	TRUE	Empty	Serpin A3-5 OS=Bos taurus OX=9913 GN=SERPINA3-5 PE=3 SV=1	Cont_A2I7N1	SERPINA3-5	46 kDa	TRUE	unknown	0	3.7034	0
295	TRUE	Empty	Acetyl-coenzyme A carboxylase carboxyl transferase subunit beta, chloroplastic OS=Moringa oleifera OX=3735 GN=accD PE=3 SV=1	A0A482EBN2	accD	56 kDa		unknown	0	0	1.4292
296	TRUE	Empty	Serotransferrin-like OS=Bos taurus OX=9913 GN=LOC525947 PE=2 SV=1	Cont_Q2HJF0	LOC525947	69 kDa		unknown	1.8859	0	0
297	TRUE	Empty	Rubber elongation factor protein OS=Hevea brasiliensis OX=3981 PE=1 SV=2	Cont_P15252		15 kDa		unknown	0	0	4.2875
298	TRUE	Empty	Putative LOV domain-containing protein OS=Moringa oleifera OX=3735 PE=2 SV=1	A0A126WWV6-DECOY		?		unknown	0	0	5.7166
299	TRUE	Empty	Protease IV OS=Pseudomonas aeruginosa OX=287 GN=prpL PE=4 SV=1	Cont_Q1WEI2	prpL	48 kDa		unknown	3.7717	0	0
300	TRUE	Empty	Cytochrome f OS=Moringa oleifera OX=3735 GN=petA PE=3 SV=1	A0A482EBB5-DECOY		?		unknown	0	0	2.1437
301	TRUE	Empty	Isoform 3 of Keratin, type I cytoskeletal 10 OS=Mus musculus OX=10090 GN=Krt10	Cont_P02535-3-DECOY		?	TRUE	unknown	1.8859	0	0
302	TRUE	Empty	Keratin, type I cytoskeletal 12 OS=Homo sapiens OX=9606 GN=KRT12 PE=1 SV=1	Cont_Q99456-DECOY		?	TRUE	unknown	2.8288	0	0
303	TRUE	Empty	AHG99682.1 2S albumin precursor [Moringa oleifera]	AHG99682.1 2S albumin precursor [Moringa oleifera]-DECOY		?	TRUE	unknown	3.7717	0	0
304	TRUE	Empty	Green fluorescent protein OS=Aequorea victoria OX=6100 GN=GFP PE=1 SV=1	Cont_P42212-DECOY		?		unknown	4.7146	0	0
305	TRUE	Empty	GDP-L-galactose phosphorylase OS=Moringa oleifera OX=3735 GN=VTC2 PE=2 SV=1	A0A097ZMP9-DECOY		?		unknown	2.8288	0	0
306	TRUE	Empty	Type I epidermal keratin mRNA, 3'end (Fragment) OS=Mus musculus OX=10090 PE=2 SV=1	Cont_Q61782		11 kDa	TRUE	unknown	2.8288	0	0
307	TRUE	Empty	Mannose-1-phosphate guanylyltransferase (Fragment) OS=Moringa oleifera OX=3735 GN=VTC1 PE=2 SV=1	A0A097ZMS2-DECOY		?		unknown	1.8859	0	0
308	TRUE	Empty	Alpha-S2-casein OS=Bos taurus OX=9913 GN=CSN1S2 PE=1 SV=2	Cont_P02663	CSN1S2	26 kDa		unknown	0	0	2.1437
309	TRUE	Empty	GFP-like fluorescent chromoprotein FP506 OS=Zoanthus sp. OX=105402 PE=1 SV=1	Cont_Q9U6Y5		26 kDa		unknown	0	0	2.8583
310	TRUE	Empty	Alcohol dehydrogenase 1 OS=Saccharomyces cerevisiae (strain ATCC 204508 / S288c) OX=559292 GN=ADH1 PE=1 SV=5	Cont_P00330	ADH1	37 kDa		unknown	0	0	1.4292
311	TRUE	Empty	Alpha-1-acid glycoprotein OS=Bos taurus OX=9913 GN=ORM1 PE=2 SV=1	Cont_Q3SZR3-DECOY		?		unknown	1.8859	5.5551	0
312	TRUE	Empty	Inositol-1-monophosphatase OS=Moringa oleifera OX=3735 GN=VTC4 PE=2 SV=1	A0A097ZMQ1	VTC4	29 kDa		unknown	0	0	2.1437
313	TRUE	Empty	Protease IV OS=Pseudomonas aeruginosa OX=287 GN=prpL PE=4 SV=1	Cont_Q1WEI2-DECOY		?		unknown	0	5.5551	1.4292
314	TRUE	Empty	Angiotensin 1-10 OS=Bos taurus OX=9913 GN=AGT PE=1 SV=1	Cont_Q3SZH5	AGT	45 kDa		unknown	0	3.7034	0
315	TRUE	Empty	30S ribosomal protein S11, chloroplastic OS=Moringa oleifera OX=3735 GN=rps11 PE=3 SV=1	A0A482EBD0	rps11	15 kDa		unknown	0	0	1.4292
316	TRUE	Empty	Fructose-bisphosphate aldolase (Fragment) OS=Moringa oleifera OX=3735 GN=FBA PE=2 SV=1	I1V1V2-DECOY		?		unknown	0	0	1.4292
317	TRUE	Empty	Uncharacterized protein OS=Bos taurus OX=9913 PE=1 SV=1	Cont_A0A3Q1M3L6		40 kDa		unknown	0	0	2.1437
318	TRUE	Empty	Keratin, type II cytoskeletal 73 OS=Homo sapiens OX=9606 GN=KRT73 PE=1 SV=1	Cont_Q86Y46-DECOY		?	TRUE	unknown	1.8859	0	0
319	TRUE	Empty	Vitronectin OS=Bos taurus OX=9913 GN=VTN PE=1 SV=1	Cont_Q3ZBS7	VTN	54 kDa		unknown	1.8859	0	0
320	TRUE	Empty	Corticosteroid-binding globulin OS=Bos taurus OX=9913 GN=SERPINA6 PE=3 SV=1	Cont_E1BF81	SERPINA6	45 kDa		unknown	1.8859	0	0
321	TRUE	Empty	GFP-like fluorescent chromoprotein FP506 OS=Zoanthus sp. OX=105402 PE=1 SV=1	Cont_Q9U6Y5-DECOY		?		unknown	0	0	2.1437
322	TRUE	Empty	Gc-globulin OS=Bos taurus OX=9913 GN=GC PE=4 SV=2	Cont_F1N5M2	GC	53 kDa		unknown	2.8288	0	2.1437
323	TRUE	Empty	50S ribosomal protein L2, chloroplastic OS=Moringa oleifera OX=3735 GN=rpl2 PE=3 SV=1	A0A482EBH6	rpl2	30 kDa		unknown	2.8288	0	2.1437
324	TRUE	Empty	Hemoglobin fetal subunit beta OS=Bos taurus OX=9913 PE=1 SV=1	Cont_P02081		16 kDa		unknown	0	0	2.8583
325	TRUE	Empty	Actin (Fragment) OS=Moringa oleifera OX=3735 PE=2 SV=1	I0AY55-DECOY		?		unknown	2.8288	0	0
326	TRUE	Empty	Photosystem II CP43 reaction center protein OS=Moringa oleifera OX=3735 GN=psbC PE=3 SV=1	A0A4Y5PRX3	psbC	50 kDa		unknown	0	0	2.1437
327	TRUE	Empty	Serpin A3-4 OS=Bos taurus OX=9913 GN=SERPINA3-4 PE=3 SV=1	Cont_A2I7N0	SERPINA3-4	46 kDa	TRUE	unknown	0	0	2.1437
328	TRUE	Empty	Hemoglobin subunit beta OS=Bos taurus OX=9913 GN=HBB PE=1 SV=1	Cont_P02070	HBB	16 kDa		unknown	0	0	1.4292
329	TRUE	Empty	Fibulin-1 OS=Bos taurus OX=9913 GN=FBLN1 PE=1 SV=1	Cont_A0A3Q1MJB2-DECOY (+1)		?		unknown	0	3.7034	0
330	TRUE	Empty	GDP-mannose 3,5-epimerase (Fragment) OS=Moringa oleifera OX=3735 GN=GME PE=2 SV=1	A0A097ZMQ0-DECOY		?		unknown	0	0	1.4292
331	TRUE	Empty	DNA-directed RNA polymerase subunit alpha OS=Moringa oleifera OX=3735 GN=rpoA PE=3 SV=1	A0A482EBI4	rpoA	38 kDa		unknown	0	0	1.4292
332	TRUE	Empty	Keratin-associated protein 16-1 OS=Homo sapiens OX=9606 GN=KRTAP16-1 PE=3 SV=1	Cont_A8MUX0-DECOY		?		unknown	1.8859	0	0
333	TRUE	Empty	Profilin-1 OS=Bos taurus OX=9913 GN=PFN1 PE=1 SV=2	Cont_P02584	PFN1	15 kDa		unknown	0	0	1.4292
334	TRUE	Empty	Clusterin OS=Bos taurus OX=9913 GN=CLU PE=1 SV=1	Cont_P17697	CLU	51 kDa		unknown	0	0	2.8583
335	TRUE	Empty	Photosystem II CP43 reaction center protein OS=Moringa oleifera OX=3735 GN=psbC PE=3 SV=1	A0A482EB42-DECOY		?		unknown	1.8859	0	0
336	TRUE	Empty	Adiponectin OS=Bos taurus OX=9913 GN=ADIPOQ PE=1 SV=1	Cont_Q3Y5Z3-DECOY		?		unknown	1.8859	0	0
337	TRUE	Empty	Corticosteroid-binding globulin OS=Bos taurus OX=9913 GN=SERPINA6 PE=3 SV=1	Cont_E1BF81-DECOY		?		unknown	0	3.7034	0
338	TRUE	Empty	Photosystem II protein D1 OS=Moringa oleifera OX=3735 GN=psbA PE=3 SV=1	A0A482EB20	psbA	39 kDa		unknown	0	0	2.1437
339	TRUE	Empty	30S ribosomal protein S12, chloroplastic OS=Moringa oleifera OX=3735 GN=rps12 PE=3 SV=1	A0A482ECX4	rps12	14 kDa		unknown	0	0	1.4292
340	TRUE	Empty	Photosystem I P700 chlorophyll a apoprotein A1 OS=Moringa oleifera OX=3735 GN=psaA PE=3 SV=1	A0A482EB40-DECOY		?		unknown	0	0	2.1437
341	TRUE	Empty	Cytochrome c OS=Bos taurus OX=9913 GN=CYCS PE=1 SV=2	Cont_P62894	CYCS	12 kDa		unknown	1.8859	0	0
342	TRUE	Empty	Tubulin alpha chain (Fragment) OS=Moringa oleifera OX=3735 GN=tua PE=2 SV=1	I3VF83-DECOY		?		unknown	1.8859	0	0
343	TRUE	Empty	Fetuin-B OS=Bos taurus OX=9913 GN=FETUB PE=1 SV=1	Cont_Q58D62-DECOY		?		unknown	1.8859	0	0
344	TRUE	Empty	30S ribosomal protein S2, chloroplastic OS=Moringa oleifera OX=3735 GN=rps2 PE=3 SV=1	A0A482EBM1-DECOY		?		unknown	2.8288	0	0
345	TRUE	Empty	30S ribosomal protein S8, chloroplastic OS=Moringa oleifera OX=3735 GN=rps8 PE=3 SV=1	A0A482ECJ6	rps8	16 kDa		unknown	0	0	2.1437
346	TRUE	Empty	Lumican OS=Bos taurus OX=9913 GN=LUM PE=1 SV=1	Cont_Q05443-DECOY		?		unknown	0	0	2.1437
347	TRUE	Empty	Inositol-1-monophosphatase OS=Moringa oleifera OX=3735 GN=VTC4 PE=2 SV=1	A0A097ZMQ1-DECOY		?		unknown	0	0	1.4292
348	TRUE	Empty	Carbonic anhydrase 2 OS=Bos taurus OX=9913 GN=CA2 PE=1 SV=3	Cont_P00921	CA2	29 kDa		unknown	0	0	1.4292
349	TRUE	Empty	Keratin-associated protein 13-3 OS=Homo sapiens OX=9606 GN=KRTAP13-3 PE=1 SV=1	Cont_Q3SY46-DECOY		?		unknown	3.7717	0	0
350	TRUE	Empty	Fetuin-B OS=Bos taurus OX=9913 GN=FETUB PE=1 SV=1	Cont_Q58D62	FETUB	43 kDa		unknown	1.8859	0	0
351	TRUE	Empty	Osteopontin OS=Bos taurus OX=9913 GN=SPP1 PE=1 SV=2	Cont_P31096-DECOY		?		unknown	1.8859	0	0
352	TRUE	Empty	Apolipoprotein A-IV OS=Bos taurus OX=9913 GN=APOA4 PE=2 SV=1	Cont_Q32PJ2-DECOY		?		unknown	2.8288	0	0
353	TRUE	Empty	Immunoglobulin light chain, lambda gene cluster OS=Bos taurus OX=9913 GN=IGL@ PE=2 SV=1	Cont_Q1RMN8	IGL	25 kDa		unknown	0	0	1.4292
354	TRUE	Empty	Origin recognition complex subunit 4 OS=Bos taurus OX=9913 GN=ORC4 PE=2 SV=1	Cont_Q2YDI2-DECOY		?		unknown	2.8288	0	0
355	TRUE	Empty	Photosystem I iron-sulfur center OS=Moringa oleifera OX=3735 GN=psaC PE=3 SV=1	A0A482ECF1	psaC	9 kDa		unknown	0	0	3.5729
356	TRUE	Empty	Hemoglobin subunit alpha OS=Bos taurus OX=9913 GN=HBA PE=1 SV=2	Cont_P01966	HBA	15 kDa		unknown	2.8288	0	0
357	TRUE	Empty	Protein HP-20 homolog OS=Bos taurus OX=9913 PE=2 SV=1	Cont_Q2KIT0-DECOY		?		unknown	1.8859	0	0
358	TRUE	Empty	L-ascorbate peroxidase (Fragment) OS=Moringa oleifera OX=3735 GN=apx PE=2 SV=1	I1U7D7	apx	14 kDa		unknown	0	0	1.4292
359	TRUE	Empty	Osteopontin OS=Bos taurus OX=9913 GN=SPP1 PE=1 SV=2	Cont_P31096	SPP1	31 kDa		unknown	3.7717	0	0
360	TRUE	Empty	Complement component C5a (Fragment) OS=Bos taurus OX=9913 PE=2 SV=1	Cont_Q1A7A4		9 kDa		unknown	0	0	1.4292
361	TRUE	Empty	Yellow fluorescent protein OS=Aliivibrio fischeri OX=668 GN=luxY PE=1 SV=1	Cont_P21578	luxY	22 kDa		unknown	0	0	1.4292
362	TRUE	Empty	Keratin-associated protein 13-3 OS=Homo sapiens OX=9606 GN=KRTAP13-3 PE=1 SV=1	Cont_Q3SY46	KRTAP13-3	19 kDa		unknown	0	0	1.4292
363	TRUE	Empty	Keratin-associated protein 13-1 OS=Homo sapiens OX=9606 GN=KRTAP13-1 PE=2 SV=2	Cont_Q8IUC0	KRTAP13-1	18 kDa		unknown	0	0	1.4292
364	TRUE	Empty	30S ribosomal protein S15, chloroplastic OS=Moringa oleifera OX=3735 GN=rps15 PE=3 SV=1	A0A482EBC8	rps15	11 kDa		unknown	0	0	1.4292
365	TRUE	Empty	Thymosin beta-10 OS=Bos taurus OX=9913 GN=TMSB10 PE=1 SV=2	Cont_P21752	TMSB10	5 kDa		unknown	0	3.7034	0
366	TRUE	Empty	Thymidylate synthase (Fragment) OS=Moringa oleifera OX=3735 GN=DHFR-TS PE=2 SV=1	I3VF84-DECOY		?		unknown	1.8859	0	0
367	TRUE	Empty	NAD(P)H-quinone oxidoreductase subunit 5, chloroplastic OS=Moringa oleifera OX=3735 GN=ndhF PE=3 SV=1	A0A482EBC0-DECOY		?		unknown	2.8288	0	0
368	TRUE	Empty	NAD(P)H-quinone oxidoreductase subunit I, chloroplastic OS=Moringa oleifera OX=3735 GN=ndhI PE=3 SV=1	A0A482ED07	ndhI	20 kDa		unknown	0	0	1.4292
369	TRUE	Empty	Gamma-tocopherol methyltransferase (Fragment) OS=Moringa oleifera OX=3735 GN=TMT PE=2 SV=1	I1V1V1	TMT	11 kDa		unknown	1.8859	0	0
END OF FILE
