# Supplementary material for: Highly effective nanoparticle removal in plant-based water filters
Source: Royal Society of Chemistry journal article supplement (doi:10.1039/d3va00035d), 2023-01-01
Supplement: d3va00035d3.xlsx [file d3va00035d3.xlsx]

## Sheet: sPsL+Cotton filters
										Non-dimensional numbers
Influent concentration (C0)	10000000000	#/mL								Collector diameter	1.2e-05	m
Effluent concentration (Ce)	3390000	#/mL		3.38844e+06						Particle diameter	2e-07	m
Length of filter	0.075	m								Pore diameter	6.2e-06	m
Geometric factor (epsilon)	1.27324									gravitational constant	9.8	m/s2
Collector diameter (dc)	1.2e-05	m								Hamaker constant	1e-20	J
Solid fraction (𝜙) or 1-p	0.394257									Dynamic viscosity water	0.001	Pa.s
Porosity	0.605743									Superficial velocity	0.00282942	m/s
Control effluent conc.	9800000000	#/mL								Particle density	1050	kg/m3
										Fluid density	1000	kg/m3
										Boltzmann constant	1.38e-23	J/K
										Temperature	298	K
Rubow and Liu model										Diffusivity	2.1817e-12	m2/s
Single collector efficiency (𝜂)	0.0117238									Settling velocity	1.08889e-12	m/s
Diffusion term	0.00938531
Interception term	0.00233849									Peclet number	15562.7
Inhomgeneity factor	1.67									Fuchs number	1.03226
Kubawara number	0.0707737									Stokes number	2.61983e-11
LN removal	7.98951									Vanderwaals factor	0.0125
Sticking coefficient	0.217211									Interception number	0.0166667
Control sticking coefficient	0.000549253									Gravitational number	3.84845e-10
Ratio of sticking coeff.	395.467
										Filter Characteristics
										Solidity (𝜙) or 1-p	0.394257
										Pore diameter	6.2e-06
										Collector diameter	1.2e-05

## Sheet: AgNPs+Cotton filters
										Non-dimensional numbers
Influent concentration (C0)	10000000000	#/mL								Collector diameter	1.2e-05	m
Effluent concentration (Ce)	1000000	#/mL								Particle diameter	5e-08	m
Length of filter	0.08	m								Pore diameter	6.2e-06	m
Geometric factor (epsilon)	1.27324									gravitational constant	9.8	m/s2
Collector diameter (dc)	1.2e-05	m								Hamaker constant	1e-20	J
Solid fraction (𝜙) or 1-p	0.394257									Dynamic viscosity water	0.001	Pa.s
Porosity	0.605743									Superficial velocity	0.00019	m/s
Control effluent conc.	9800000000	#/mL								Particle density	15000	kg/m3
										Fluid density	1000	kg/m3
										Boltzmann constant	1.38e-23	J/K
										Temperature	298	K
Rubow and Liu model										Diffusivity	8.72678e-12	m2/s
Single collector efficiency (𝜂)	0.143296									Settling velocity	1.90556e-11	m/s
Diffusion term	0.143148
Interception term	0.000147975									Peclet number	261.265
Inhomgeneity factor	1.67									Fuchs number	1.00806
Kubawara number	0.0707737									Stokes number	3.0787e-11
LN removal	9.21034									Vanderwaals factor	2.97834
Sticking coefficient	0.0192063									Interception number	0.00416667
Control sticking coefficient	4.21287e-05									Gravitational number	1.00292e-07
Ratio of sticking coeff.	455.896
										Filter Characteristics
										Solidity (𝜙) or 1-p	0.394257
										Pore diameter	6.2e-06
										Collector diameter	1.2e-05
